1 **Self-Administration of entactogen psychostimulants dysregulates GABA and Kappa**  
2 **Opioid Receptor signaling in the central nucleus of the amygdala of female Wistar**  
3 **rats**

4 Sophia Khom<sup>1,2, †</sup>, Jacques D. Nguyen<sup>3,4 †</sup>, Sophia A. Vandewater<sup>3</sup>, Yanabel Grant<sup>3,4</sup>, Marisa  
5 Roberto<sup>1,\*</sup>, and Michael A. Taffe<sup>3,4,\*</sup>

6  
7 <sup>1</sup>Department of Molecular Medicine, The Scripps Research Institute, La Jolla, CA, USA

8 <sup>2</sup>Department of Pharmaceutical Sciences, University of Vienna, Austria

9 <sup>3</sup>Department of Neuroscience, The Scripps Research Institute, La Jolla, CA, USA

10 <sup>4</sup>Department of Psychiatry, University of California San Diego, La Jolla, CA, USA

11

12 † Sophia Khom and Jacques D. Nguyen have contributed equally and share first authorship.

13

14 \* Correspondence:

15 Dr. Michael A. Taffe, Department of Psychiatry; 9500 Gilman Dr. MC 0714; University of California  
16 San Diego, La Jolla, CA 92093; USA; Phone: +1-858-246-5638; Email: mtaffe@health.ucsd.edu

17 AND

18 Dr. Marisa Roberto, Department of Molecular Medicine, 10550 N. Torrey Pines Rd., The Scripps  
19 Research Institute, La Jolla 92037, USA, Phone: +1-858-7262; Email: mroberto@scripps.edu

20

21 Keywords: intravenous self-administration, MDMA, pentylone, methylone, central amygdala, inhibitory  
22 synaptic transmission, electrophysiology

23

24

25

26

27

28

29

30

31

32 **Abstract (295 words)**

33 Male rats escalate intravenous self-administration of entactogen psychostimulants, 3,4-  
34 methylenedioxymethcathinone (methylone) and 3,4-methylenedioxymethamphetamine (MDMA)  
35 under extended access conditions, as with typical psychostimulants. Here, we investigated whether  
36 female rats escalate self-administration of methylone, 3,4-methylenedioxy-pentadone (pentylone),  
37 and MDMA and then studied consequences of MDMA and pentylone self-administration on GABA<sub>A</sub>  
38 receptor and kappa opioid receptor (KOR) signaling in the central nucleus of the amygdala (CeA), a  
39 brain area critically dysregulated by extended access self-administration of alcohol or cocaine. Adult  
40 female Wistar rats were trained to self-administer methylone, pentylone, MDMA (0.5 mg/kg/infusion),  
41 or saline-vehicle using a fixed-ratio 1 response contingency in 6-hour sessions (long-access: LgA)  
42 followed by progressive ratio (PR) dose-response testing. The effects of pentylone-LgA, MDMA-LgA  
43 and saline on basal GABAergic transmission (miniature postsynaptic inhibitory currents, mIPSCs) and  
44 the modulatory role of KOR at CeA GABAergic synapses were determined in acute brain slices using  
45 whole-cell patch-clamp. Methylone-LgA and pentylone-LgA rats similarly escalated their drug intake  
46 (both obtained more infusions compared to MDMA-LgA rats) however, pentylone-LgA rats reached  
47 higher breakpoints in PR tests. At the cellular level, baseline CeA GABA transmission was markedly  
48 elevated in pentylone-LgA and MDMA-LgA rats compared to saline-vehicle. Specifically, pentylone-  
49 LgA was associated with increased CeA mIPSC frequency (GABA release) and amplitude  
50 (postsynaptic GABA<sub>A</sub> receptor function), while mIPSC amplitudes (but not frequency) was larger in  
51 MDMA-LgA rats compared to saline rats. In addition, pentylone-LgA and MDMA-LgA profoundly  
52 disrupted CeA KOR signaling such as both KOR agonism (1mM U50488) and KOR antagonism  
53 (200nM nor-binaltorphimine) decreased mIPSC frequency suggesting recruitment of non-canonical  
54 KOR signaling pathways. This study confirms escalated self-administration of entactogen  
55 psychostimulants under LgA conditions in female rats which is accompanied by increased CeA  
56 GABAergic inhibition and altered KOR signaling. Collectively, our study suggests that CeA GABA and  
57 KOR mechanisms play a critical role in entactogen self-administration like those observed with  
58 escalation of alcohol or cocaine self-administration.

59

60

61

62

63

64

65

66

67

68

69

70

71

72

## 73 Introduction

74 The entactogen psychostimulant drugs 3,4-methylenedioxymethamphetamine (MDMA), 3,4-  
75 methylenedioxymethcathinone (Methylone) and 3,4-methylenedioxypentadone (Pentylone) are  
76 commonly abused substances. MDMA, Methylone and Pentylone are monoamine transporter  
77 inhibitors and substrates with increased selectivity for serotonin over dopamine or norepinephrine  
78 transporters (Baumann et al., 2011; Simmler et al., 2013; Simmler et al., 2014a). Importantly, MDMA,  
79 Methylone and Pentylone are structurally closely related such that MDMA differs from Methylone by  
80 only the ketone on the beta carbon, while Methylone differs from Pentylone with respect to the length  
81 of the  $\alpha$ -alkyl chain (Simmler et al., 2014b). Previous intravenous self-administration (IVSA) studies  
82 in male rats indicated that MDMA exhibits low efficacy as a reinforcer, leading to low overall drug  
83 intake and high inter-subject variability compared with, e.g., cocaine or methamphetamine (Bradbury  
84 et al., 2014; Creehan et al., 2015; Dalley et al., 2007). This has long been assumed to be a  
85 consequence of the pharmacological selectivity of MDMA for serotonin transporter inhibition and  
86 efflux, compared with the closely-related methamphetamine. However, previous studies  
87 demonstrated that MDMA is a more effective reinforcer when animals are initially trained to self-  
88 administer mephedrone (Creehan et al., 2015), or under higher ambient temperature conditions  
89 (Aarde et al., 2017; Cornish et al., 2008, 2003). Furthermore, male rats will obtain more infusions of  
90 MDMA when trained under daily extended or long-access sessions (6-hour) compared to short access  
91 (2-hour) sessions (Vandewater et al., 2015). Finally, despite 4-methylmethcathinone exhibiting  
92 preferential serotonin release (Kehr et al., 2011; Wright et al., 2012), similar to MDMA, it is a robust  
93 reinforcer in rat IVSA models (Creehan et al., 2015; Hadlock et al., 2011; Marusich et al., 2021;  
94 Nguyen et al., 2017). Thus there is evidence that under some circumstances, the serotonin transporter  
95 selective entactogen class stimulants can produce compulsive drug seeking behavior in rodent IVSA.

96 Within the class of entactogen stimulants, the propensity to support robust self-administration  
97 may vary. Pentylone appears to be more efficacious as a reinforcer than Methylone in a dose-  
98 substitution comparison in male and female rats originally trained to self-administer methamphetamine  
99 and  $\alpha$ -pyrrolidinopentiophenone, respectively (Dolan et al., 2018; Javadi-Paydar et al., 2018). This  
100 may be because Pentylone exhibits reduced efficacy as a monoamine transporter substrate compared  
101 to MDMA or Methylone (Dolan et al., 2018), and displays less serotonin selectivity as a monoamine  
102 transporter inhibitor relative to MDMA (Baumann et al., 2012; Simmler et al., 2016; Linda D. Simmler  
103 et al., 2014). This pharmacological profile suggests that Pentylone would be a highly efficacious  
104 reinforcer in rat IVSA procedures but it has not been well characterized apart from the two above-  
105 mentioned dose substitutions studies in animals trained on other drugs. Importantly, there are only  
106 limited data available that elucidate the abuse liability of entactogen stimulants in female subjects.  
107 These data show that, at least under 2-hour access conditions, the IVSA of Mephedrone(4-  
108 methylmethcathinone), Methylone and MDMA do not differ dramatically between male and female  
109 rats (Creehan et al., 2015; Javadi-Paydar et al., 2018; Vandewater et al., 2015). While Methylone  
110 IVSA is similar to MDMA IVSA when male rats are permitted 2h daily sessions, Methylone appears to  
111 be much more effective than MDMA under 6h daily access conditions (Nguyen et al., 2017;  
112 Vandewater et al., 2015). Therefore, subtle differences in IVSA methods may either reveal or obscure  
113 differences in abuse liability. This may be critical for the accuracy of inferences made about two or  
114 more closely-related entactogen psychomotor stimulants.

115 Thus, one major goal of this study was to determine if long-access to IVSA of three  
116 entactogens leads to escalating drug intake in female rats, as it does in males. As has been reviewed,  
117 it is increasingly recognized as important to confirm similarities and differences that may obtain  
118 between the sexes in a range of biomedical and neuroscience investigations (Clayton and Collins,  
119 2014; Shansky and Murphy, 2021). A second goal was to test the hypothesis that extended access  
120 sessions would lead to increased IVSA of methylone relative to MDMA, as predicted by the indirect

121 comparison of male long-access IVSA data (Nguyen et al., 2017; Vandewater et al., 2015). Lastly, we  
122 aimed to investigate neuroadaptations in synaptic transmission in the central nucleus of the amygdala  
123 (CeA) given its key role in the acute reinforcing actions of drugs of abuse as well the negative  
124 emotional state associated with drug withdrawal (Koob and Volkow, 2016). The CeA is composed  
125 primarily of GABAergic neurons and represents the major output area of the larger amygdaloid  
126 complex (Gilpin et al., 2015; Roberto et al., 2020). Chronic administration of drugs of abuse including  
127 ethanol (Gilpin et al., 2015; Kirson et al., 2021; Roberto et al., 2010, 2004), cocaine (Kallupi et al.,  
128 2013; Schmeichel et al., 2017; Sun and Yuill, 2020), methamphetamine (Li et al., 2015) or opioids  
129 (Bajo et al., 2014, 2011; Kallupi et al., 2020) enhance CeA GABA transmission representing a key  
130 molecular mechanism underlying maladaptive behaviors associated with addiction. Importantly, the  
131 CeA expresses several pro- and anti-stress promoting systems regulating its neuronal activity  
132 including the dynorphin/kappa opioid receptor (KOR) system, and chronic administration of drugs of  
133 abuse recruits these CeA stress systems (Koob, 2021; Koob and Schulkin, 2019). Specifically,  
134 cocaine-LgA is associated with a profound recruitment of CeA dynorphin/KOR signaling such as  
135 blockade of CeA KOR signaling reduces anxiety-like behaviors and cocaine-induced locomotor  
136 sensitization. Interestingly, cocaine-LgA also lead to a profound dysregulation of the CeA  
137 dynorphin/KOR system at the molecular level such as the KOR agonist U50488 increased CeA GABA  
138 release while the KOR antagonist nor-binaltorphimine decreased it (Kallupi et al., 2013). However, it  
139 has not yet been investigated whether or how MDMA-LgA or Pentylone-LgA affect CeA neuronal  
140 activity including GABAergic transmission and its regulation by the dynorphin/KOR system.

141 Thus, here we used acquisition of self-administration under long-access (6-hour) conditions,  
142 and post-acquisition dose substitutions under a Progressive Ratio schedule of reinforcement to  
143 assess potential differences in behavioral patterns in entactogen self-administration. For example,  
144 steeper escalation during LgA acquisition, or upward shifts in dose-response functions, are often  
145 inferred to represent meaningful differences in “addictiveness”. However, a difference in training-dose  
146 can appear to show differential “escalation” of IVSA of the same drug, such as with methamphetamine  
147 (Kitamura et al., 2006), and animals trained on a more-efficacious drug will respond for more of a less-  
148 efficacious drug, compared with those trained on the latter (Creehan et al., 2015; Vandewater et al.,  
149 2015). To determine if similar neuroadaptations are produced by long-access self-administration of  
150 drugs which produced different behavioral patterns, we performed *ex vivo* slice electrophysiology to  
151 assess changes in CeA GABA transmission and its regulation by the dynorphin/KOR system in female  
152 MDMA-LgA and Pentylone-LgA rats.

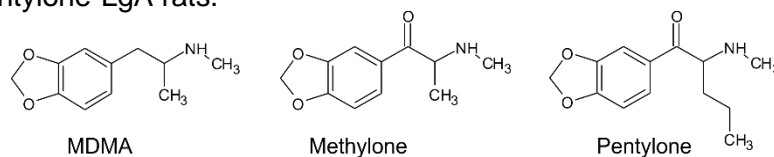

153  
154  
155 **Figure 1.** Structural formulae of MDMA, Methylone and Pentylone.  
156  
157

## 158 **Materials and Methods**

### 159 **Animals**

160 Female (N=56) Wistar rats (Charles River, New York) entered the laboratory at 10 weeks of age and  
161 were housed in humidity and temperature-controlled (23±1°C) vivaria on 12:12 hour light:dark cycles.  
162 Animals had *ad libitum* access to food and water in their home cages. All experimental procedures  
163 took place in scotophase and were conducted under protocols approved by the Institutional Care and  
164 Use Committees of The Scripps Research Institute and in a manner consistent with the Guide for the  
165 Care and Use of Laboratory Animals (National Research Council (U.S.). Committee for the Update of  
166 the Guide for the Care and Use of Laboratory Animals. et al., 2011).  
167

168 **Drugs**

169 Pentylone-HCl and Methylone-HCl were obtained from Cayman Chemical. 3,4-  
170 methylenedioxymethamphetamine (MDMA) HCl was obtained from NIDA Drug Supply. The MDMA  
171 analog was obtained from Fox Chase Chemical Diversity Center (Doylestown, PA, USA). Drugs were  
172 dissolved in physiological saline for the i.v. routes of administration. Dosing is expressed as the salt.  
173 We purchased tetrodotoxin (TTX) from Biotium (Hayward, CA, USA), and AP-5, CGP55845A and  
174 DNQX, U-50488 and nor-binaltorphimine from Tocris (Bristol, UK) for the electrophysiological  
175 recordings. Stock solutions of the drugs were prepared in either distilled water or dimethyl sulfoxide  
176 (DMSO) and added to the bath solution to achieve the desired concentration.

177

178 **Intravenous catheterization**

179 Rats were anesthetized with an isoflurane/oxygen vapor mixture (isoflurane 5 % induction, 1-3 %  
180 maintenance) and prepared with chronic intravenous catheters as described previously (Nguyen et  
181 al., 2017a; Nguyen et al., 2018). Briefly, the catheters consisted of a 14-cm length polyurethane-based  
182 tubing (MicroRenathane®, Braintree Scientific, Inc, Braintree MA, USA) fitted to a guide cannula  
183 (Plastics one, Roanoke, VA) curved at an angle and encased in dental cement anchored to an ~3-cm  
184 circle of durable mesh. Catheter tubing was passed subcutaneously from the animal's back to the  
185 right jugular vein. Catheter tubing was inserted into the vein and secured gently with suture thread. A  
186 liquid tissue adhesive was used to close the incisions (3M™ Vetbond™ Tissue Adhesive; 1469S B).  
187 A minimum of 4 days was allowed for surgical recovery prior to starting an experiment. For the first 3  
188 days of the recovery period, an antibiotic (cephazolin) and an analgesic (flunixin) were administered  
189 daily. During testing and training, intravenous catheters were flushed with ~0.2–0.3 ml heparinized  
190 (32.3 USP/ml) saline before sessions and ~0.2–0.3 ml heparinized saline containing cefazolin (100  
191 mg/ml) after sessions. Catheter patency was assessed once a week, beginning in the third week of  
192 training, via administration through the catheter of ~0.2 ml (10 mg/ml) of the ultra-short-acting  
193 barbiturate anesthetic, Brevital sodium (1 % methohexital sodium; Eli Lilly, Indianapolis, IN). Animals  
194 with patent catheters exhibit prominent signs of anesthesia (pronounced loss of muscle tone) within 3  
195 s after infusion. Animals that failed to display these signs were considered to have faulty catheters  
196 and were discontinued from the study. Data that were collected after the previous passing of the test  
197 were excluded from analysis.

198

199 **Self-administration Procedure**

200 *Experiment 1 Acquisition:* Following recovery from catheter implantation, rats were trained to self-  
201 administer MDMA (0.5 mg/kg per infusion; N=14), methylone (0.5 mg/kg per infusion; N=12),  
202 pentylone (0.5 mg/kg per infusion; N=15), or saline vehicle (N=8) using a fixed-ratio 1 (FR1) response  
203 contingency in 6-hour sessions. One individual in the MDMA group, 2 individuals in the methylone  
204 group and 2 individuals in the Pentylone group were lost due to nonpatent catheters. One individual  
205 in the Pentylone group was lost due to the catheter being chewed off by the cage mate. Operant  
206 conditioning chambers (Med Associates; Med-PC IV software) enclosed in sound-attenuating cubicles  
207 were used for self-administration studies as previously described (Nguyen et al., 2018, 2017). A pump  
208 pulse calculated to clear non-drug saline through the catheter started the session to ensure the first  
209 reinforcer delivery was not diluted, and a single priming infusion was delivered non-contingently if no  
210 response was made in the first 30 minutes of the session. Acquisition training was conducted for 14-  
211 15 sessions depending on the group so only the first 14 sessions are analyzed for the comparison.

212

213 *Progressive-ratio (PR) dose-response testing:* Rats in active drug groups were next subjected to dose  
214 substitution with the respective training drug (0.125, 0.5, 1.0, 2.5 mg/kg/infusion), followed by dose  
215 substitution with methamphetamine (0.01, 0.05, 0.1, 0.5 mg/kg/infusion), in a randomized order under  
216 a Progressive Ratio (PR) response contingency. One individual in the Pentylone group was lost due  
217 to the catheter being chewed off by the cage mate. The saline group completed five sequential PR  
218 sessions but again, only vehicle was available. For the PR, the sequence of response ratios started  
219 with one response then progressed thru ratios determined by the following equation (rounded to the



220 nearest integer): Response Ratio =  $5e^{(\text{injection number} * j)} - 5$  (Richardson and Roberts, 1996).  
221 The value of “j” was 0.2 and was chosen so as to observe a “breakpoint” within ~3 hrs. The last ratio  
222 completed before the end of the session (1 h after the last response up to a maximum of 3 h sessions)  
223 was operationally defined as the breakpoint. Following assessment with the training drug, groups were  
224 permitted to self-administer methamphetamine doses (0.01, 0.05, 0.1, 0.5 mg/kg/infusion) in a  
225 randomized order under the same PR schedule of reinforcement.

### 226 *Experiment 2 Acquisition:*

227 Following recovery from catheter implantation, rats were trained to self-administer MDMA (0.5 mg/kg  
228 per infusion; N=8), pentylone (0.5 mg/kg per infusion; N=11), or saline vehicle (N=4), using a fixed-  
229 ratio 1 (FR1). One individual in the MDMA group was euthanized for illness. Acquisition training was  
230 conducted for 11-14 sessions depending on the group so only the first 11 sessions are analyzed for  
231 the comparison. Following acquisition, rats were trained on a variable number of sessions (X-Y total  
232 including acquisition) awaiting euthanasia for electrophysiological recordings.

### 233 *Animals for electrophysiology*

234  
235 Electrophysiological recordings were performed from a total of 28 randomly chosen rats. Specifically,  
236 we recorded from 8 rats from the saline-control group, 14 rats from the MDMA-LgA group, and 6 rats  
237 from the Pentylone-LgA group. Tissue for electrophysiology was collected 18 hours after the last self-  
238 administration session at the time animals would anticipate the next self-administration session.  
239 Importantly, rats were allowed to freely cycle during the self-administration process, and estrous cycle  
240 stage for each rat was determined upon sacrifice to evaluate its potential impact on CeA physiology.  
241 Estrous cycle was assessed based on cytological appearance of vaginal smear after euthanasia as  
242 described in (McLean et al., 2012). However, rats from both the saline and MDMA-LgA group were  
243 mainly in either pro-estrus or estrus, while Pentylone-LgA rats were either in estrus or diestrus. Thus,  
244 based on the unequal representation of estrous cycle stages in the different groups, data for GABA  
245 signaling and KOR pharmacology were pooled.

### 246 *Slice preparation and electrophysiological recordings*

247  
248 Preparation of acute brain slices containing the central nucleus of the amygdala (CeA) and  
249 electrophysiological recordings were performed as previously described (Khom et al., 2020a,b;  
250 Steinman et al., 2020; Suárez et al., 2019; Varodayan et al., 2018). Briefly, deeply anesthetized rats  
251 (3-5% isoflurane anesthesia) were quickly decapitated, and their brains placed in an ice-cold  
252 oxygenated high-sucrose cutting solution composed of 206 mM sucrose, 2.5 mM KCl, 0.5 mM CaCl<sub>2</sub>,  
253 7 mM MgCl<sub>2</sub>, 1.2 mM NaH<sub>2</sub>PO<sub>4</sub>, 26 mM NaHCO<sub>3</sub>, 5 mM glucose, and 5 mM HEPES. We cut 300 μm  
254 thick coronal slices with the medial subdivision of the central amygdala (CeA) using a Leica VT 1000S  
255 and incubated them for 30 minutes in 37°C warm, oxygenated artificial cerebrospinal fluid (aCSF),  
256 composed of (in mM) 130 NaCl, 3.5 KCl, 2 CaCl<sub>2</sub>, 1.25 NaH<sub>2</sub>PO<sub>4</sub>, 1.5 MgSO<sub>4</sub>, 24 NaHCO<sub>3</sub>, and 10  
257 glucose, followed by another 30 minutes incubation at room temperature. We identified CeA neurons  
258 with infrared differential interference contrast optics using a 40x water-immersion objective (Olympus  
259 BX51WI), and a CCD camera (EXi Aqua, QImaging). Using whole-cell patch technique, we recorded  
260 from 135 neurons pharmacologically isolated, action-potential independent miniature inhibitory  
261 postsynaptic currents (mIPSC) by adding the sodium-channel blocker tetrodotoxin (500nM, TTX),  
262 blockers of glutamate-mediated neurotransmission (6,7-dinitroquinoxaline-2,3-dione, 20μM (DNQX)  
263 and DL-2-amino-5-phosphonovalerate, 30μM (AP-5)), and the GABAB receptor antagonist  
264 CGP55845A (1μM) to the bath aCSF solution. All neurons were held -60mV. We performed recordings  
265 in a gap-free acquisition mode with a 10 kHz sampling rate and 10 kHz low-pass filtering using a  
266 MultiClamp700B amplifier, Digidata 1440A, and pClamp 10 software (MolecularDevices, San Jose,  
267 CA, USA). We pulled patch pipettes from borosilicate glass (3-5mΩ, King Precision) and filled them  
268 with a KCl-based internal solution composed of 145 mM KCl, 5mM EGTA, 5mM MgCl<sub>2</sub>, 10mM  
269 HEPES, 2mM Mg-ATP, and 0.2mM Na-GTP; pH was adjusted to 7.2-7.4 using 1N NaOH. We

271 recorded only from neurons with an access resistance ( $R_a$ ) <15M $\Omega$  and/or with a  $R_a$  change <20%  
 272 during the recording, as monitored by frequent 10mV pulses.  
 273

274 **Data analysis and Statistics**

275 The number of infusions obtained in the IVSA experiments was analyzed by repeated measures  
 276 *rmANOVA* with Sessions (acquisition only) or Dose as within-subjects factors. Significant main effects  
 277 from the *rmANOVA* were further analyzed with post hoc multiple comparisons analysis using the  
 278 *Tukey* procedure for multi-level, and the *Dunnnett* procedure for two-level factors. Two missing data  
 279 points (caused by program failure) in the Pentylone-trained rats during Session 11 were interpolated  
 280 from the values before and after the last Session.

281 Frequencies, amplitudes, and current kinetics including current rise and decay times of  
 282 mIPSCs were analyzed using MiniAnalysis software (Synaptosoft, Decatur, GA, USA). Data are given  
 283 as means $\pm$ S.E.M of raw values for mIPSC basal characteristics or from normalized values when  
 284 assessing the effects of the KOR agonist U-50488 or the  
 285 KOR antagonist nor-binaltorphimine (norBNI) on  
 286 mIPSCs. Differences in mIPSC baseline characteristics  
 287 were determined by a one-way *ANOVA* and a *Dunnnett*  
 288 post-hoc analysis. *Per se* effects of U-50488 or norBNI  
 289 on mIPSCs were calculated by *one-sample t-tests*, and  
 290 differences in drug effects across treatments was then  
 291 also determined by *one-way ANOVA* with *Dunnnett* post-  
 292 hoc analyses. The criterion for significant results for both  
 293 behavioral and electrophysiological data was set at  $P <$   
 294 0.05 and all analyses were conducted using Prism 7 for  
 295 Windows (v. 7.03; GraphPad Software, Inc, San Diego  
 296 CA).

297  
 298  
 299 **Results**

300 **Female Wistar rats escalate self-administration of**  
 301 **entactogen psychostimulants under extended**  
 302 **access (6-hour) conditions.**

303 The mean number of infusions obtained by rats trained  
 304 on vehicle saline (N=8) decreased across sections,  
 305 whereas infusions obtained by rats trained on pentylone,  
 306 methylone or MDMA (for structural formulae, see Fig. 1)  
 307 increased across the 14-session acquisition interval with  
 308 the lowest mean drug-intake observed in the MDMA  
 309 group and highest in the Pentylone group (Fig. 2A).  
 310 Analysis of the saline, MDMA (N=13), Methylone (N=10)  
 311 and Pentylone (N=12) groups confirmed a main effect of  
 312 Session [ $F(13, 481) = 15.2; P < 0.0001$ ], of Group [ $F(3,$   
 313  $37) = 3.324; P = 0.03$ ] and of the interaction of factors [ $F$   
 314  $(39, 481) = 2.368; P < 0.0001$ ], on infusions obtained.  
 315 The post hoc test confirmed that infusions were  
 316 significantly increased compared to the first session in  
 317 the Methylone (Sessions 8-14), Pentylone (Sessions 5-  
 318 14) and MDMA groups (Sessions 9, 11-14); no  
 319 significant differences in infusions were confirmed within the Vehicle trained group. Additionally, the  
 320 Pentylone group was significantly different from Vehicle group during Sessions 5 and 10-14 and from  
 321 the MDMA group during Sessions 5-6,13-14. The drug-lever responding (%) was significantly higher  
 322 compared to responding Session 1 (Fig. 2B). The ANOVA confirmed a significant main effect of

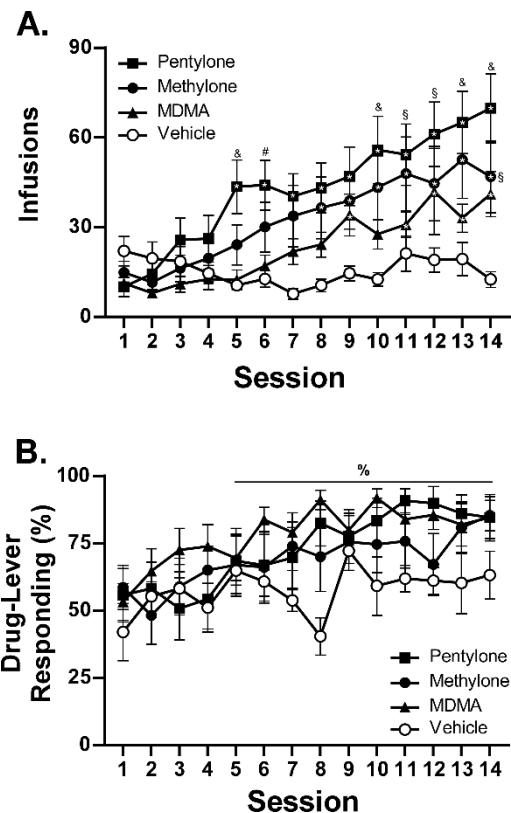

**Figure 2.** **A)** Mean ( $\pm$  S.E.M.) infusions of Pentylone (N=12), Methylone (N=10), MDMA(N=13), and saline (N=8; Vehicle) obtained under extended access conditions. **B)** Mean ( $\pm$  S.E.M.) percent of responses on the drug-associated lever. A significant difference from the first session, within group, is indicated with \*, a significant difference from the first session, collapsed across groups, with %, a difference from the Vehicle and MDMA groups with &, a difference from the Vehicle group with \$, and a difference from the MDMA group with #.

323 Session [ $F(13, 481) = 5.799$ ;  $P < 0.0001$ ] but not of Group [ $F(3, 37) = 1.649$ ;  $P = 0.1948$ ] or of the  
324 interaction of factors [ $F(39, 481) = 5.799$ ;  $P = 0.4339$ ]. The post hoc test confirmed that drug-lever  
325 responding during Sessions 5-14 was significantly different from the first session, collapsed across  
326 groups. During the final 5 sessions of acquisition, Pentylone and Methylone groups exhibited >80%  
327 drug-associated lever responding. The MDMA group exhibited >80% drug-associated lever  
328 responding during the final 2 sessions.  
329

### 331 **Dose substitution in female Wistar rats following escalation of self-administration of** 332 **entactogen psychostimulants.**

333 The rats trained on Pentylone (N=9), Methylone (N=7) or MDMA (N=10) under long-access conditions  
334 exhibited group differences during dose substitution experiments (**Fig. 3A**). Analysis confirmed a main  
335 effect of Dose [ $F(4, 92) = 30.04$ ;  $P < 0.0001$ ], of Drug [ $F(2, 23) = 6.067$ ;  $P = 0.0077$ ] and of the  
336 interaction of factors [ $F(8, 92) = 2.57$ ;  $P < 0.05$ ], on infusions obtained. Overall, rats trained on  
337 Methylone and Pentylone increased their intake to an approximately similar extent and received higher  
338 number of infusions compared to rats trained on MDMA. Pentylone-trained rats reached higher  
339 breakpoints than Methylone and MDMA-trained groups in PR tests.  
340

341 When presented with methamphetamine substitution (**Fig. 3B**), Pentylone-LgA rats (N=8)  
342 similarly received higher number of infusions compared to rats trained on both Methylone-LgA (N=5)  
343 or MDMA-LgA rats. Analysis confirmed a main effect of Dose [ $F(4, 92) = 30.04$ ;  $P < 0.0001$ ], of Drug  
344 [ $F(2, 23) = 6.067$ ;  $P = 0.0077$ ] and of the interaction of factors [ $F(8, 92) = 2.57$ ;  $P < 0.05$ ], on infusions  
345 obtained. One Pentylone animal that maintained patency was eliminated for exhibiting no dose  
346 sensitivity in the MA challenge, and two Methylone animals were eliminated due to failed catheter  
347 patency.

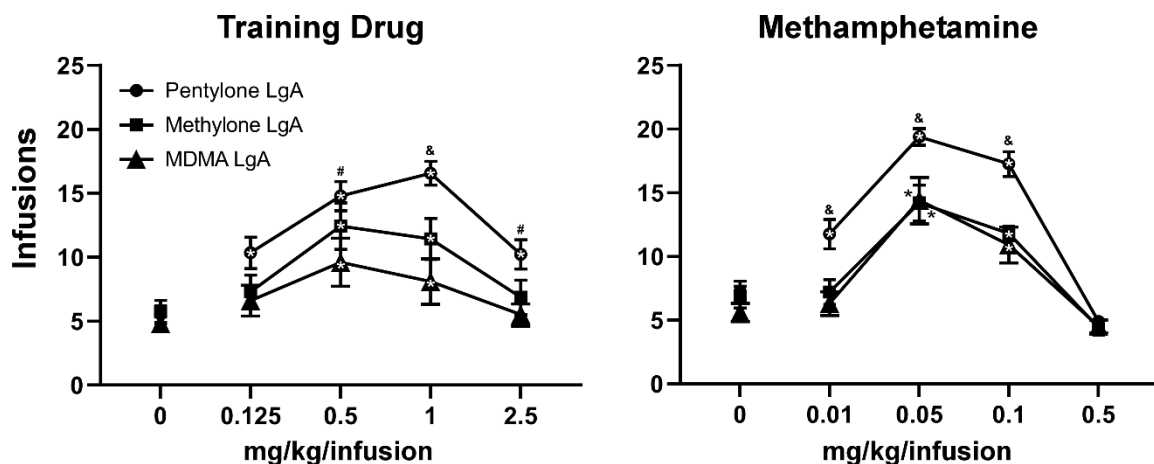

348 **Figure 3.** Mean ( $\pm$  S.E.M.) infusions of the respective training drug and of methamphetamine obtained by groups trained  
349 in LgA-IVSA of pentylone (N=8-9), methylone (N=5-7) or MDMA (N=10) are illustrated. A significant difference from  
350 saline, within group, is indicated with \*, a significant difference from both other groups with &, and a difference from the  
351 MDMA LgA group with #.

352 To further explicate the role of drug training history, the Pentylone-trained group were  
353 evaluated on doses of MDMA and the MDMA-trained group on doses of Pentylone, using the PR  
354 procedure. Pentylone supported higher levels of responding than did MDMA regardless of the training  
355 drug (**Fig 4**). Analysis confirmed a main effect of Dose [ $F(4, 132) = 35.75$ ;  $P < 0.0001$ ], of Drug [ $F(3,$   
356  $33) = 12.47$ ;  $P < 0.0001$ ] and of the interaction of factors [ $F(12, 132) = 2.098$ ;  $P < 0.05$ ], on infusions  
obtained. The post hoc test confirmed that Pentylone-trained rats obtained a significantly higher  
number of infusions of Pentylone (0.125-2.5 mg/kg/infusion) compared to vehicle, and MDMA-trained  
rats also obtained more infusions of Pentylone than of vehicle (0.5-2.5 mg/kg/infusion). Similarly, each



357 group obtained significantly more MDMA infusions (0.5 mg/kg/infusion) compared with vehicle. Within  
358 each drug, the groups did not differ, and exhibited similar dose-effect functions.  
359  
360

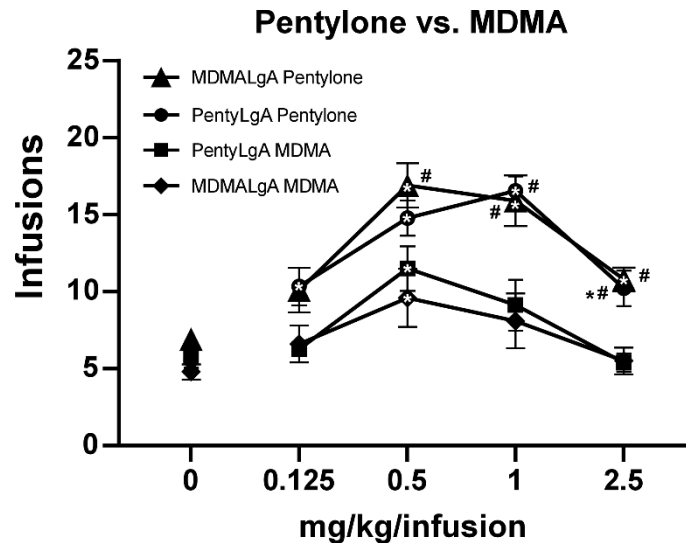

**Figure 4.** Mean ( $\pm$  S.E.M.) infusions of Pentylone and of MDMA obtained by groups trained in LgA IVSA of pentylone (N=8-9) or MDMA (N=10). A significant difference from saline, within group, is indicated with \*, a significant difference from MDMA, within each LgA group, is indicated with #.

361  
362 **Self-administration of MDMA or pentylone heightens CeA inhibitory signaling**

363 Next, we assessed whether intravenous self-administration of MDMA (MDMA-LgA) or Pentylone  
364 (Pentylone-LgA) impacts CeA GABA transmission given that the CeA is highly sensitive to drugs of  
365 abuse such as alcohol or cocaine (Kallupi et al., 2013; Lesscher and Vanderschuren, 2012; Roberto  
366 et al., 2020; Schmeichel et al., 2017). We recorded pharmacologically isolated action-potential  
367 independent miniature inhibitory postsynaptic currents (mIPSCs) in 42 neurons from saline-control  
368 animals, 41 neurons from MDMA-LgA and 52 neurons from Pentylone-LgA rats. (Female rats that  
369 were selected for electrophysiological studies exhibited mean levels of drug-intake that were  
370 statistically indistinguishable from the rats that underwent behavioral testing only; **Fig. S1-3**). We  
371 found that MDMA-LgA and Pentylone-LgA increased CeA GABAergic transmission. Specifically, a  
372 *one-way ANOVA* ( $F(2, 132) = 5.021, P = 0.0079$ ) with *Dunnnett* post hoc analysis revealed that  
373 Pentylone-LgA but not MDMA-LgA significantly increased mIPSC frequencies compared to saline-  
374 controls (Saline:  $0.74 \pm 0.09$  Hz vs. Pentylone-LgA:  $1.12 \pm 0.09$  Hz,  $P = 0.0040$  vs. MDMA-LgA:  
375  $0.90 \pm 0.08$  Hz,  $P = 0.3347$ ) suggesting enhanced vesicular GABA release (see **Fig. 5A, C**). Moreover,  
376 both pentylone-LgA and MDMA-LgA significantly increased mIPSC amplitudes (*one-way ANOVA*:  $F(2, 132) = 7.617, P = 0.0007$ ; *Dunnnett* post hoc analysis: Saline:  $57.1 \pm 2.2$  pA vs. MDMA-LgA:  
377  $68.2 \pm 2.8$  pA,  $P = 0.0063$  vs. Pentylone-LgA:  $70.0 \pm 2.5$  pA,  $P = 0.0006$ , **Fig. 5B, D**) indicative of  
378 heightened postsynaptic GABA<sub>A</sub> receptor function. Pentylone-LgA was further associated with faster  
379 mIPSC rise times (*one-way ANOVA*:  $F(2, 132) = 4.974, P = 0.0083$ ) while mIPSC rise times were  
380 similar between MDMA-LgA and saline controls (*Dunnnett* post hoc analysis: Saline:  $2.67 \pm 0.04$  ms vs.  
381 MDMA-LgA:  $2.61 \pm 0.04$  ms,  $P = 0.5142$  vs. Pentylone-LgA:  $2.50 \pm 0.04$  ms,  $P = 0.0051$ , **Fig. 5B, E**).  
382 Lastly, mIPSC decay times did not significantly differ between experimental groups ( $F(2, 132) = 1.839,$   
383  $P = 0.1631$ , Saline:  $9.0 \pm 0.3$  ms vs. MDMA-LgA:  $9.1 \pm 0.4$  ms vs. Pentylone-LgA:  $8.3 \pm 0.3$  ms, see **Fig.**  
384 **5B, F**). These data indicate that MDMA-LgA and Pentylone-LgA induce profound neuroadaptations to  
385 increase CeA GABA signaling which is a characteristic neuroadaptation observed after self-  
386 administration of other drugs of abuse.  
387  
388

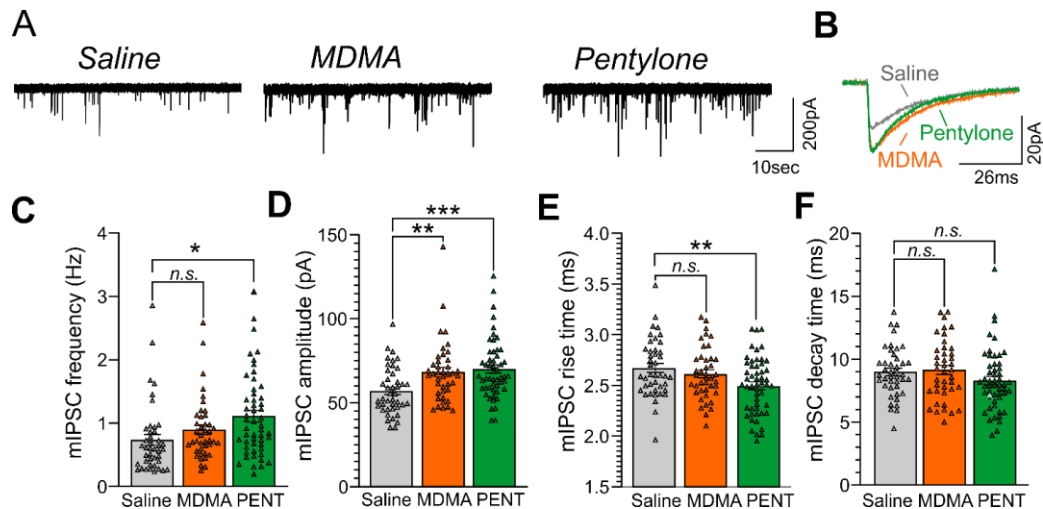

389

390 **Figure 5.** A) Representative mIPSC recordings from CeA neurons from female Wistar rats self-administering Saline (left  
 391 MDMA (middle panel), or Pentylone (abbreviated PENT, right panel). (B) Scaled mIPSC averages illustrating the  
 392 effects of MDMA-LgA and Pentylone-LgA on mIPSC amplitudes and kinetics. Bars in represent means  $\pm$  S.E.M. of mIPSC  
 393 (C) frequencies, (D) amplitudes, (E) rise and (D) decay times. Differences between groups were calculated using a one-way  
 394 ANOVA with Dunnet post hoc analyses. (\*) =  $P < 0.05$ , (\*\*) =  $P < 0.01$ , (\*\*\*) =  $P < 0.001$ .

### 395 **MDMA and Pentylone self-administration disrupt endogenous KOR signaling**

396 Given that CeA dynorphin/KOR signaling drives behaviors associated with excessive drug  
 397 consumption including cocaine or alcohol self-administration (Anderson et al., 2019; Bloodgood et al.,  
 398 2020; Kallupi et al., 2013; Koob, 2008), we lastly tested whether MDMA-LgA or Pentylone-LgA would  
 399 also alter KOR-mediated regulation of vesicular CeA GABA release. As shown in **Fig. 6**, activating  
 400 KOR by application of the selective agonist U-50488 ( $1\mu\text{M}$  as in (Gilpin et al., 2014; Kallupi et al.,  
 401 2013)) in saline-controls significantly decreased mIPSC frequency ( $63.1\pm 3.6\%$ ,  $t = 10.13$ ,  $df = 10$ ,  $P <$   
 402  $0.0001$ , *one-sample t-test*) without affecting any postsynaptic measures indicating that KOR agonism  
 403 reduces CeA presynaptic GABA release (**Fig. 6A, B**). Conversely, application of the KOR antagonist  
 404 nor-binaltorphimine (norBNI,  $200\text{nM}$ , as in (Gilpin et al., 2014; Kallupi et al., 2013)) increased mIPSC  
 405 frequency ( $119.1\pm 7.9\%$ ,  $t = 2.414$ ,  $df = 9$ ,  $P = 0.039$ ) in saline-controls indicative of a tonic  
 406 endogenous dynorphin/KOR signaling regulating GABA signaling under physiological conditions also  
 407 in female rats (**Fig. 6A, C**). Moreover, norBNI did not alter postsynaptic properties of mIPSCs in saline-  
 408 controls as has been previously reported (Kallupi et al., 2013).  
 409

409

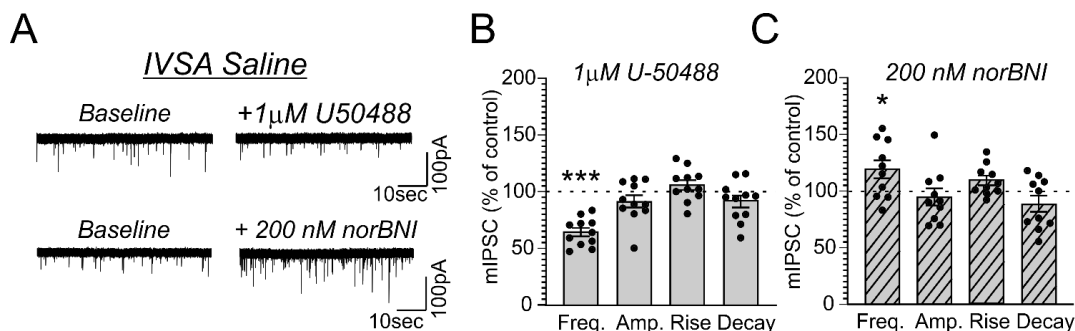

410

411 **Figure 6.** (A) Representative mIPSCs from CeA neurons during control and during superfusion with the KOR-agonist U-  
 412 50488 ( $1\mu\text{M}$ , upper panel) or the KOR-antagonist norBNI ( $200\text{nM}$ , lower panel) are shown. Bars represent means  $\pm$  S.E.M  
 413 of the normalized effects either (B) U-50488 or (C) norBNI at the indicated concentration on mIPSC characteristics.  
 414 Statistically significant differences to baseline control were calculated using a one-sample t-test. (\*) =  $P < 0.05$ , (\*\*\*) =  $P <$   
 415  $0.001$ .

416 Application of U-50488 (1 $\mu$ M) similarly decreased mIPSC frequency in MDMA-LgA (62.7 $\pm$ 8.8%,  $t =$   
 417 4.243,  $df = 10$ ,  $P = 0.0017$ , *one-sample t-test*, **Fig.7A, B**) and Pentylone-LgA (50.5 $\pm$ 6.4%,  $t = 7.747$ ,  
 418  $df = 11$ ,  $P < 0.0001$ , *one-sample t-test*, **Fig. 8A, B**) rats. A *one-way ANOVA* analysis further confirmed  
 419 that the effects of U-50455 on mIPSC frequency did not differ between saline, MDMA-LgA and  
 420 Pentylone-LgA rats ( $F(2, 31) = 1.196$ ,  $P = 0.3161$ ). U-50488 did not alter mIPSC amplitudes and  
 421 current kinetics in MDMA-LgA rats, but it significantly decreased mIPSC amplitudes in Pentylone-LgA  
 422 rats without affecting mIPSC rise and decay times indicating that KOR-activation after Pentylone-self-  
 423 administration also decreases postsynaptic GABA<sub>A</sub> receptor function presumably leading to reduced  
 424 neuronal inhibition. Moreover, a *one-way ANOVA* analysis confirmed highly significant differences in  
 425 the effects of the KOR-antagonist norBNI on CeA vesicular GABA release in MDMA-LgA and  
 426 Pentylone-LgA rats compared to saline-controls ( $F(2, 33) = 13.13$ ,  $P < 0.0001$ ). Specifically, unlike to  
 427 the control group (Fig 6C) where we found that application of norBNI (200nM) increased mIPSC  
 428 frequency, in both MDMA-LgA (79.0 $\pm$ 7.5%,  $t = 2.682$ ,  $df = 12$ ,  $P = 0.02$ , *one-sample t-test*) and  
 429 Pentylone-LgA rats (65.6 $\pm$ 5.5%,  $t = 6.249$ ,  $df = 11$ ,  $P < 0.0001$ , *one-sample t-test*) norBNI decreased  
 430 GABA release. Overall, this switch in the tonic role of KOR in modulating GABA release combined  
 431 with the evidence that antagonist and agonist display a similar pharmacological profile suggests that  
 432 both excessive MDMA and Pentylone self-administration under long-access conditions induce  
 433 significant neuroadaptations of KOR receptor signaling. Lastly, norBNI did not significantly alter any  
 434 postsynaptic mIPSC characteristics including amplitude, rise or decay times in either MDMA-LgA  
 435 (**Fig.7C**) or Pentylone-LgA rats (**Fig. 8C**).  
 436

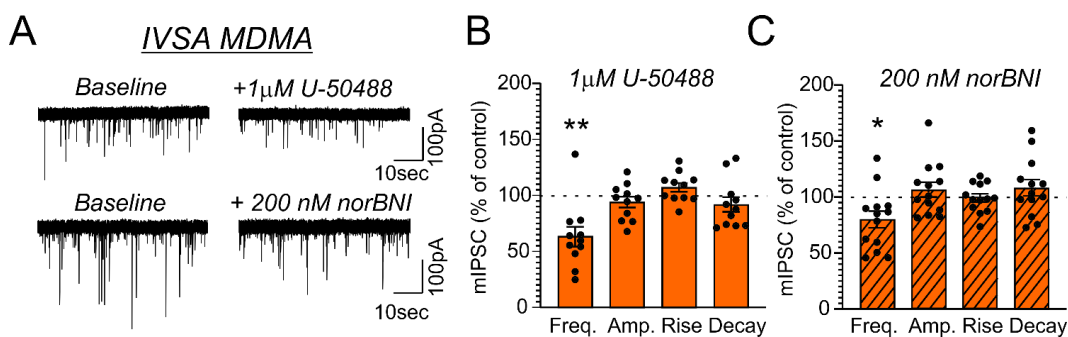

437

438 **Figure 7.** (A) Representative mIPSCs from CeA neurons during control and during superfusion with the KOR-agonist U-  
 439 50488 (1 $\mu$ M, upper panel) or the KOR-antagonist norBNI (200nM, lower panel) are shown. Bars represent means  $\pm$  S.E.M  
 440 of the normalized effects of (B) U-50488 or (C) norBNI on mIPSC characteristics. Statistically significant differences to  
 441 baseline control were calculated using a *one-sample t-test*. (\*) =  $P < 0.05$ , (\*\*) =  $P < 0.01$ .

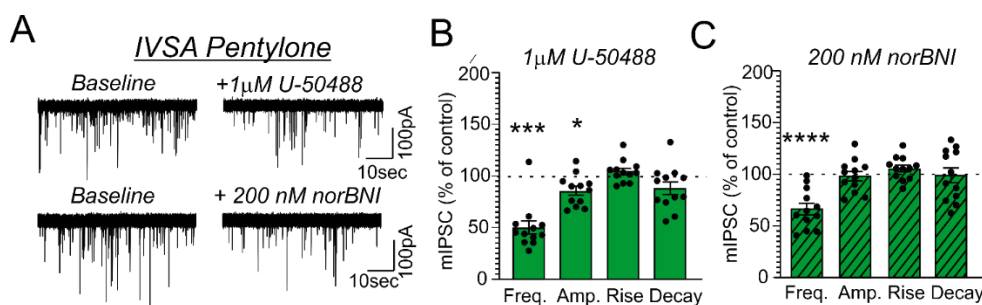

442

443 **Figure 8.** (A) Representative mIPSCs from CeA neurons during control and during superfusion with the KOR-agonist U-  
 444 50488 (1 $\mu$ M, upper panel) or the KOR-antagonist norBNI (200nM, lower panel) are shown. Bars represent means  $\pm$  S.E.M  
 445 of the normalized effects either (B) U-50488 or (C) norBNI at the indicated concentration on mIPSC characteristics.  
 446 Statistically significant differences to baseline control were calculated using a *one-sample t-test*. (\*) =  $P < 0.05$ , (\*\*) =  $P <$   
 447 0.01.

## 448 Discussion

449 This study shows that female rats readily acquire the self-administration of methylone,  
450 pentylone and MDMA under 6-hour long-access (LgA) daily training conditions. The groups trained  
451 on Methylone and Pentylone increased their intake to an approximately similar extent, with MDMA-  
452 trained animals increasing to a slightly lower extent, when considered as a population. This represents  
453 the first replication of extended-access IVSA intake of entactogen cathinones and MDMA that was  
454 previously reported for male rats trained to self-administer Methylone, Mephedrone or MDMA (Nguyen  
455 et al., 2017; Vandewater et al., 2015). Moreover, this is the first study to demonstrate a profound  
456 dysregulation of CeA neuronal activity in response to self-administration of entactogens in female rats.  
457 Together these results confirm that there is nothing qualitatively protective about the entactogens  
458 relative to other drugs of abuse, e.g., methamphetamine, cocaine or alcohol, and apparent differences  
459 in behavioral responding in intravenous self-administration procedures may be a function of the  
460 duration of action of a training dose (akin to what has been reported for methamphetamine; (Kitamura  
461 et al., 2006)). The post-acquisition dose-effect curves further emphasize that that in some cases the  
462 training history may (methamphetamine) or may not (Pentylone/MDMA) interact with the available  
463 drug to determine self-administration rate. However, systematic dose functions for highly effective  
464 reinforcers such as Pentylone and methamphetamine illustrated that all groups, regardless of training  
465 history, exhibited motivated drug-seeking behavior. One unexpected outcome was the self-  
466 administration of the MDMA analog, since it was constructed to be the amphetamine analog of  
467 Pentylone (**Fig. S4**). In the between groups analysis of the PR dose-substitution, Pentylone was more  
468 efficacious in comparison with Methylone (i.e., the cathinone analog of MDMA). The MDMA analog  
469 compound exhibited, if anything, reduced potency and similar efficacy relative to MDMA, represented  
470 by a rightward shift of the dose-response curve. This is a further caution against simplistic structure-  
471 activity inferences about *in vivo* activity in the intravenous self-administration procedure.

472 The drug substitution experiments show that inferences that MDMA is less addictive based on  
473 lower rates of intravenous self-administration during acquisition or in a dose-substitution procedure  
474 may be misleading. This was further confirmed by the electrophysiological experiments. The  
475 disruption of CeA synaptic transmission that has been associated with escalated self-administration  
476 of a range of drugs also occurred in the MDMA LgA group in this study. Effects were similar in  
477 entactogen trained groups that exhibited differences in behavioral drug intake. Specifically, we found  
478 that both MDMA-LgA and Pentylone-LgA exhibited markedly elevated CeA GABA transmission  
479 leading to enhanced local inhibition by either increasing presynaptic GABA release (Pentylone-LgA)  
480 and/or enhancing postsynaptic GABA<sub>A</sub> receptor function (MDMA-LgA and Pentylone-LgA).  
481 Importantly, elevated inhibitory CeA signaling is a key molecular mechanism driving behaviors  
482 associated with drug abuse including escalation of drug intake in response to the emergence of the  
483 negative emotional state (Koob, 2021). Thus, our electrophysiological data indicate that Pentylone-  
484 LgA increased GABA transmission at both pre- and postsynaptic sites including potential changes in  
485 GABA<sub>A</sub> receptor subunit composition leading to a presumably stronger CeA neuronal inhibition, while  
486 MDMA-LgA only elevated postsynaptic GABA<sub>A</sub> receptor function but did not affect CeA GABA release.

487 Our study revealed that regulation of CeA synaptic GABA transmission by the dynorphin/KOR  
488 system in female rats does not differ from that in male rats (Gilpin et al., 2014; Kallupi et al., 2020);  
489 that is, activation of KOR in female rats also decreases CeA GABA release, while KOR antagonism  
490 increases CeA GABA transmission supporting a tonic role of KOR in the basal CeA GABA activity.  
491 Furthermore, both MDMA and Pentylone self-administration under long-access conditions disrupted  
492 CeA regulation by the dynorphin/KOR system. Specifically, we found that KOR activation with U-  
493 50488 decreased CeA GABA transmission in both MDMA-LgA and Pentylone-LgA rats mainly via  
494 reducing presynaptic GABA release. Moreover, the KOR antagonist norBNI did not *increase* CeA  
495 GABA transmission (as in saline controls) but *decreased* it in both MDMA-LgA and Pentylone-LgA  
496 rats. Interestingly, Pentylone-LgA animals escalated their drug intake significantly more than MDMA-  
497 LgA rats suggesting that distinct neuroadaptations within CeA GABAergic synapses, associated with  
498 more pronounced local inhibition, may potentially account for the observed differences in drug  
499 escalation. KOR activation with U-50488 decreased postsynaptic GABA<sub>A</sub> receptor function only in



500 Pentylone-LgA rats suggesting larger inhibitory effects of KOR activation on CeA GABAergic  
501 synapses after Pentylone-LgA.

502 Similar paradoxical effects of norBNI on CeA GABA signaling (i.e., norBNI decreasing CeA  
503 GABA transmission instead of increasing it) have been previously reported after cocaine-LgA (Kallupi  
504 et al., 2013). However, while after cocaine-LgA the effect of the KOR agonist on CeA GABA release  
505 had also changed directionality, i.e., KOR activation led to increased instead of decreased GABA  
506 signaling, in our study the KOR agonist U-50488 decreased CeA GABA release. This indicates some  
507 distinctions of the neuroadaptations at GABAergic synapses in response to cocaine-LgA vs. MDMA-  
508 LgA or Pentylone-LgA. Potentially, the fact that cocaine, MDMA and pentylone exhibit different  
509 mechanisms of action with respect to their activities at the different monoamine transporters  
510 (Baumann and Volkow, 2016; Glatfelter et al., 2021; Saha et al., 2019; Sandtner et al., 2016; Linda  
511 D. Simmler et al., 2014; Simmler et al., 2016; Steinkellner et al., 2011) may account for distinct  
512 neuroadaptations at CeA GABAergic synapses. Interestingly, the fact that norBNI did not increase  
513 CeA GABA release after Pentylone and MDMA self-administration may suggest a loss of tonic  
514 dynorphin signaling in the CeA at first sight, but it could also stem from alternative or non-canonical  
515 KOR signaling cascades resulting from repeated drug exposure. Indeed, KOR signaling has been  
516 shown to highly sensitive to stressful events and moreover, it induces activation of kinase cascades  
517 including G-protein coupled Receptor Kinases (GRK) and members of the mitogen-activated protein  
518 kinase (MAPK) family or  $\beta$ -arrestin-dependent pathways, amongst other classical G-protein mediated  
519 mechanisms (Bruchas and Chavkin, 2010; Ho et al., 2018; Lovell et al., 2015; Uprety et al., 2021).  
520 Thus, we hypothesize that the observed norBNI effects stem from changes in KOR signaling rather  
521 than a loss of CeA dynorphin, however, future studies utilizing different KOR antagonists will facilitate  
522 more insights into this phenomenon.

523 Overall, this study represents the first replication of extended-access IVSA intake of  
524 entactogen cathinones and MDMA in female rats, similar to that previously reported for male rats. The  
525 *in vivo* efficacy of cathinone compounds as reinforcers may not be supported by simplistic structure-  
526 activity inferences, nor by simplistic analysis of response rates in the acquisition of IVSA. Comparison  
527 of training groups across IVSA of the same compounds indicates a more similar motivational state.  
528 Furthermore, our studies also reveal similar profound neuroadaptations of CeA GABA transmission,  
529 and its regulation by the dynorphin/KOR system, in both MDMA-LgA and Pentylone-LgA groups,  
530 despite behavioral differences in the acquisition phase. Heightened GABA signaling associated with  
531 increased local inhibition in the CeA might represent a consistent, key mechanism underlying the  
532 escalation of drug self-administration.

## 533 References

- 534 Aarde, S.M., Huang, P.-K., Taffe, M.A., 2017. High ambient temperature facilitates the acquisition of  
535 3,4-methylenedioxymethamphetamine (MDMA) self-administration. *Pharmacol Biochem*  
536 *Behav* 163, 38–49. <https://doi.org/10.1016/j.pbb.2017.10.008>
- 537 Anderson, R.I., Lopez, M.F., Griffin, W.C., Haun, H.L., Bloodgood, D.W., Pati, D., Boyt, K.M., Kash,  
538 T.L., Becker, H.C., 2019. Dynorphin-kappa opioid receptor activity in the central amygdala  
539 modulates binge-like alcohol drinking in mice. *Neuropsychopharmacology* 44, 1084–1092.  
540 <https://doi.org/10.1038/s41386-018-0294-3>
- 541 Bajo, M., Madamba, S.G., Roberto, M., Siggins, G.R., 2014. Acute morphine alters GABAergic  
542 transmission in the central amygdala during naloxone-precipitated morphine withdrawal: role  
543 of cyclic AMP. *Front Integr Neurosci* 8, 45. <https://doi.org/10.3389/fnint.2014.00045>
- 544 Bajo, M., Roberto, M., Madamba, S.G., Siggins, G.R., 2011. Neuroadaptation of GABAergic  
545 transmission in the central amygdala during chronic morphine treatment. *Addict Biol* 16, 551–  
546 564. <https://doi.org/10.1111/j.1369-1600.2010.00269.x>

- 547 Baumann, M.H., Ayestas, M.A., Partilla, J.S., Sink, J.R., Shulgin, A.T., Daley, P.F., Brandt, S.D.,  
548 Rothman, R.B., Ruoho, A.E., Cozzi, N.V., 2012. The designer methcathinone analogs,  
549 mephedrone and methylone, are substrates for monoamine transporters in brain tissue.  
550 *Neuropsychopharmacology* 37, 1192–1203. <https://doi.org/10.1038/npp.2011.304>
- 551 Baumann, M.H., Volkow, N.D., 2016. Abuse of New Psychoactive Substances: Threats and Solutions.  
552 *Neuropsychopharmacology* 41, 663–665. <https://doi.org/10.1038/npp.2015.260>
- 553 Bloodgood, D.W., Hardaway, J.A., Stanhope, C.M., Pati, D., Pina, M.M., Neira, S., Desai, S., Boyt,  
554 K.M., Palmiter, R.D., Kash, T.L., 2020. Kappa opioid receptor and dynorphin signaling in the  
555 central amygdala regulates alcohol intake. *Mol Psychiatry*. [https://doi.org/10.1038/s41380-](https://doi.org/10.1038/s41380-020-0690-z)  
556 [020-0690-z](https://doi.org/10.1038/s41380-020-0690-z)
- 557 Bradbury, S., Bird, J., Colussi-Mas, J., Mueller, M., Ricaurte, G., Schenk, S., 2014. Acquisition of  
558 MDMA self-administration: pharmacokinetic factors and MDMA-induced serotonin release.  
559 *Addict Biol* 19, 874–884. <https://doi.org/10.1111/adb.12069>
- 560 Bruchas, M.R., Chavkin, C., 2010. Kinase cascades and ligand-directed signaling at the kappa opioid  
561 receptor. *Psychopharmacology (Berl)* 210, 137–147. [https://doi.org/10.1007/s00213-010-](https://doi.org/10.1007/s00213-010-1806-y)  
562 [1806-y](https://doi.org/10.1007/s00213-010-1806-y)
- 563 Clayton, J.A., Collins, F.S., 2014. Policy: NIH to balance sex in cell and animal studies. *Nature* 509,  
564 282–283. <https://doi.org/10.1038/509282a>
- 565 Cornish, J.L., Clemens, K.J., Thompson, M.R., Callaghan, P.D., Dawson, B., McGregor, I.S., 2008.  
566 High ambient temperature increases intravenous methamphetamine self-administration on  
567 fixed and progressive ratio schedules in rats. *J Psychopharmacol* 22, 100–110.  
568 <https://doi.org/10.1177/0269881107082286>
- 569 Cornish, J.L., Shahnawaz, Z., Thompson, M.R., Wong, S., Morley, K.C., Hunt, G.E., McGregor, I.S.,  
570 2003. Heat increases 3,4-methylenedioxymethamphetamine self-administration and social  
571 effects in rats. *Eur J Pharmacol* 482, 339–341. <https://doi.org/10.1016/j.ejphar.2003.09.060>
- 572 Creehan, K.M., Vandewater, S.A., Taffe, M.A., 2015. Intravenous self-administration of mephedrone,  
573 methylone and MDMA in female rats. *Neuropharmacology* 92, 90–97.  
574 <https://doi.org/10.1016/j.neuropharm.2015.01.003>
- 575 Dalley, J.W., Lääne, K., Theobald, D.E.H., Peña, Y., Bruce, C.C., Huszar, A.C., Wojcieszek, M.,  
576 Everitt, B.J., Robbins, T.W., 2007. Enduring deficits in sustained visual attention during  
577 withdrawal of intravenous methylenedioxymethamphetamine self-administration in rats:  
578 results from a comparative study with d-amphetamine and methamphetamine.  
579 *Neuropsychopharmacology* 32, 1195–1206. <https://doi.org/10.1038/sj.npp.1301220>
- 580 Dolan, S.B., Chen, Z., Huang, R., Gatch, M.B., 2018. “Ecstasy” to addiction: Mechanisms and  
581 reinforcing effects of three synthetic cathinone analogs of MDMA. *Neuropharmacology* 133,  
582 171–180. <https://doi.org/10.1016/j.neuropharm.2018.01.020>
- 583 Gilpin, N.W., Herman, M.A., Roberto, M., 2015. The central amygdala as an integrative hub for anxiety  
584 and alcohol use disorders. *Biol. Psychiatry* 77, 859–869.  
585 <https://doi.org/10.1016/j.biopsych.2014.09.008>
- 586 Gilpin, N.W., Roberto, M., Koob, G.F., Schweitzer, P., 2014. Kappa opioid receptor activation  
587 decreases inhibitory transmission and antagonizes alcohol effects in rat central amygdala.  
588 *Neuropharmacology* 77, 294–302. <https://doi.org/10.1016/j.neuropharm.2013.10.005>
- 589 Glatfelter, G.C., Walther, D., Evans-Brown, M., Baumann, M.H., 2021. Eutylone and Its Structural  
590 Isomers Interact with Monoamine Transporters and Induce Locomotor Stimulation. *ACS Chem*  
591 *Neurosci* 12, 1170–1177. <https://doi.org/10.1021/acscchemneuro.0c00797>

- 592 Hadlock, G.C., Webb, K.M., McFadden, L.M., Chu, P.W., Ellis, J.D., Allen, S.C., Andrenyak, D.M.,  
593 Vieira-Brock, P.L., German, C.L., Conrad, K.M., Hoonakker, A.J., Gibb, J.W., Wilkins, D.G.,  
594 Hanson, G.R., Fleckenstein, A.E., 2011. 4-Methylmethcathinone (mephedrone):  
595 neuropharmacological effects of a designer stimulant of abuse. *J Pharmacol Exp Ther* 339,  
596 530–536. <https://doi.org/10.1124/jpet.111.184119>
- 597 Ho, J.-H., Stahl, E.L., Schmid, C.L., Scarry, S.M., Aubé, J., Bohn, L.M., 2018. G protein signaling-  
598 biased agonism at the  $\kappa$ -opioid receptor is maintained in striatal neurons. *Sci Signal* 11,  
599 eaar4309. <https://doi.org/10.1126/scisignal.aar4309>
- 600 Javadi-Paydar, M., Nguyen, J.D., Vandewater, S.A., Dickerson, T.J., Taffe, M.A., 2018. Locomotor  
601 and reinforcing effects of pentedrone, pentylone and methylone in rats. *Neuropharmacology*  
602 134, 57–64. <https://doi.org/10.1016/j.neuropharm.2017.09.002>
- 603 Kallupi, M., Carrette, L.L.G., Kononoff, J., Solberg Woods, L.C., Palmer, A.A., Schweitzer, P., George,  
604 O., de Guglielmo, G., 2020. Nociceptin attenuates the escalation of oxycodone self-  
605 administration by normalizing CeA-GABA transmission in highly addicted rats. *Proc Natl Acad*  
606 *Sci U S A* 117, 2140–2148. <https://doi.org/10.1073/pnas.1915143117>
- 607 Kallupi, M., Wee, S., Edwards, S., Whitfield, T.W., Oleata, C.S., Luu, G., Schmeichel, B.E., Koob,  
608 G.F., Roberto, M., 2013. Kappa opioid receptor-mediated dysregulation of gamma-  
609 aminobutyric acidergic transmission in the central amygdala in cocaine addiction. *Biol*  
610 *Psychiatry* 74, 520–528. <https://doi.org/10.1016/j.biopsych.2013.04.028>
- 611 Kehr, J., Ichinose, F., Yoshitake, S., Goiny, M., Sievertsson, T., Nyberg, F., Yoshitake, T., 2011.  
612 Mephedrone, compared with MDMA (ecstasy) and amphetamine, rapidly increases both  
613 dopamine and 5-HT levels in nucleus accumbens of awake rats. *Br J Pharmacol* 164, 1949–  
614 1958. <https://doi.org/10.1111/j.1476-5381.2011.01499.x>
- 615 Khom, S., Wolfe, S.A., Patel, R.R., Kirson, D., Hedges, D.M., Varodayan, F.P., Bajo, M., Roberto, M.,  
616 2020a. Alcohol Dependence and Withdrawal Impair Serotonergic Regulation of GABA  
617 Transmission in the Rat Central Nucleus of the Amygdala. *J Neurosci* 40, 6842–6853.  
618 <https://doi.org/10.1523/JNEUROSCI.0733-20.2020>
- 619 Khom, S., Steinkellner, T., Hnasko, T.S., Roberto, M., 2020b. Alcohol dependence potentiates  
620 substance P/neurokinin-1 receptor signaling in the rat central nucleus of amygdala. *Sci Adv* 6,  
621 eaaz1050. <https://doi.org/10.1126/sciadv.aaz1050>
- 622 Kirson, D., Khom, S., Rodriguez, L., Wolfe, S.A., Varodayan, F.P., Gandhi, P.J., Patel, R.R.,  
623 Vlkolinsky, R., Bajo, M., Roberto, M., 2021. Sex Differences in Acute Alcohol Sensitivity of  
624 Naïve and Alcohol Dependent Central Amygdala GABA Synapses. *Alcohol Alcohol.*  
625 <https://doi.org/10.1093/alcalc/agab034>
- 626 Kitamura, O., Wee, S., Specio, S.E., Koob, G.F., Pulvirenti, L., 2006. Escalation of methamphetamine  
627 self-administration in rats: a dose-effect function. *Psychopharmacology (Berl)* 186, 48–53.  
628 <https://doi.org/10.1007/s00213-006-0353-z>
- 629 Koob, G.F., 2021. Drug Addiction: Hyperkatifeia/Negative Reinforcement as a Framework for  
630 Medications Development. *Pharmacol Rev* 73, 163–201.  
631 <https://doi.org/10.1124/pharmrev.120.000083>
- 632 Koob, G.F., 2008. A role for brain stress systems in addiction. *Neuron* 59, 11–34.  
633 <https://doi.org/10.1016/j.neuron.2008.06.012>
- 634 Koob, G.F., Schulkin, J., 2019. Addiction and stress: An allostatic view. *Neurosci Biobehav Rev* 106,  
635 245–262. <https://doi.org/10.1016/j.neubiorev.2018.09.008>
- 636 Koob, G.F., Volkow, N.D., 2016. Neurobiology of addiction: a neurocircuitry analysis. *Lancet*  
637 *Psychiatry* 3, 760–773. [https://doi.org/10.1016/S2215-0366\(16\)00104-8](https://doi.org/10.1016/S2215-0366(16)00104-8)

- 638 Lesscher, H.M.B., Vanderschuren, L.J.M.J., 2012. Compulsive drug use and its neural substrates.  
639 *Rev Neurosci* 23, 731–745. <https://doi.org/10.1515/revneuro-2012-0066>
- 640 Li, X., Zeric, T., Kambhampati, S., Bossert, J.M., Shaham, Y., 2015. The central amygdala nucleus is  
641 critical for incubation of methamphetamine craving. *Neuropsychopharmacology* 40, 1297–  
642 1306. <https://doi.org/10.1038/npp.2014.320>
- 643 Lovell, K.M., Frankowski, K.J., Stahl, E.L., Slauson, S.R., Yoo, E., Prisinzano, T.E., Aubé, J., Bohn,  
644 L.M., 2015. Structure-activity relationship studies of functionally selective kappa opioid  
645 receptor agonists that modulate ERK 1/2 phosphorylation while preserving G protein over  
646  $\beta$ arrestin2 signaling bias. *ACS Chem Neurosci* 6, 1411–1419.  
647 <https://doi.org/10.1021/acchemneuro.5b00092>
- 648 Marusich, J.A., Gay, E.A., Watson, S.L., Blough, B.E., 2021. Alpha-pyrrolidinopentiophenone and  
649 mephedrone self-administration produce differential neurochemical changes following short-  
650 or long-access conditions in rats. *Eur J Pharmacol* 897, 173935.  
651 <https://doi.org/10.1016/j.ejphar.2021.173935>
- 652 McLean, A.C., Valenzuela, N., Fai, S., Bennett, S.A.L., 2012. Performing vaginal lavage, crystal violet  
653 staining, and vaginal cytological evaluation for mouse estrous cycle staging identification. *J*  
654 *Vis Exp* e4389. <https://doi.org/10.3791/4389>
- 655 Nguyen, J.D., Grant, Y., Creehan, K.M., Vandewater, S.A., Taffe, M.A., 2017. Escalation of  
656 intravenous self-administration of methylone and mephedrone under extended access  
657 conditions. *Addict Biol* 22, 1160–1168. <https://doi.org/10.1111/adb.12398>
- 658 Nguyen, J.D., Hwang, C.S., Grant, Y., Janda, K.D., Taffe, M.A., 2018. Prophylactic vaccination  
659 protects against the development of oxycodone self-administration. *Neuropharmacology* 138,  
660 292–303. <https://doi.org/10.1016/j.neuropharm.2018.06.026>
- 661 Roberto, M., Cruz, M.T., Gilpin, N.W., Sabino, V., Schweitzer, P., Bajo, M., Cottone, P., Madamba,  
662 S.G., Stouffer, D.G., Zorrilla, E.P., Koob, G.F., Siggins, G.R., Parsons, L.H., 2010.  
663 Corticotropin releasing factor-induced amygdala gamma-aminobutyric Acid release plays a  
664 key role in alcohol dependence. *Biol. Psychiatry* 67, 831–839.  
665 <https://doi.org/10.1016/j.biopsych.2009.11.007>
- 666 Roberto, M., Kirson, D., Khom, S., 2020. The Role of the Central Amygdala in Alcohol Dependence.  
667 *Cold Spring Harb Perspect Med*. <https://doi.org/10.1101/cshperspect.a039339>
- 668 Roberto, M., Madamba, S.G., Stouffer, D.G., Parsons, L.H., Siggins, G.R., 2004. Increased GABA  
669 release in the central amygdala of ethanol-dependent rats. *J. Neurosci.* 24, 10159–10166.  
670 <https://doi.org/10.1523/JNEUROSCI.3004-04.2004>
- 671 Saha, K., Li, Y., Holy, M., Lehner, K.R., Bukhari, M.O., Partilla, J.S., Sandtner, W., Sitte, H.H.,  
672 Baumann, M.H., 2019. The synthetic cathinones, butylone and pentylone, are stimulants that  
673 act as dopamine transporter blockers but 5-HT transporter substrates. *Psychopharmacology*  
674 (Berl) 236, 953–962. <https://doi.org/10.1007/s00213-018-5075-5>
- 675 Sandtner, W., Stockner, T., Hasenhuetl, P.S., Partilla, J.S., Seddik, A., Zhang, Y.-W., Cao, J., Holy,  
676 M., Steinkellner, T., Rudnick, G., Baumann, M.H., Ecker, G.F., Newman, A.H., Sitte, H.H.,  
677 2016. Binding Mode Selection Determines the Action of Ecstasy Homologs at Monoamine  
678 Transporters. *Mol. Pharmacol.* 89, 165–175. <https://doi.org/10.1124/mol.115.101394>
- 679 Schmeichel, B.E., Herman, M.A., Roberto, M., Koob, G.F., 2017. Hypocretin Neurotransmission  
680 Within the Central Amygdala Mediates Escalated Cocaine Self-administration and Stress-  
681 Induced Reinstatement in Rats. *Biol Psychiatry* 81, 606–615.  
682 <https://doi.org/10.1016/j.biopsych.2016.06.010>



- 683 Shansky, R.M., Murphy, A.Z., 2021. Considering sex as a biological variable will require a global shift  
684 in science culture. *Nat Neurosci* 24, 457–464. <https://doi.org/10.1038/s41593-021-00806-8>
- 685 Simmler, L.D., Buchy, D., Chaboz, S., Hoener, M.C., Liechti, M.E., 2016. In Vitro Characterization of  
686 Psychoactive Substances at Rat, Mouse, and Human Trace Amine-Associated Receptor 1. *J*  
687 *Pharmacol Exp Ther* 357, 134–144. <https://doi.org/10.1124/jpet.115.229765>
- 688 Simmler, L. D., Rickli, A., Schramm, Y., Hoener, M.C., Liechti, M.E., 2014a. Pharmacological profiles  
689 of aminoindanes, piperazines, and pipradrol derivatives. *Biochem Pharmacol* 88, 237–244.  
690 <https://doi.org/10.1016/j.bcp.2014.01.024>
- 691 Simmler, L. D., Rickli, A., Hoener, M.C., Liechti, M.E., 2014b. Monoamine transporter and receptor  
692 interaction profiles of a new series of designer cathinones. *Neuropharmacology* 79, 152–160.  
693 <https://doi.org/10.1016/j.neuropharm.2013.11.008>
- 694 Steinkellner, T., Freissmuth, M., Sitte, H.H., Montgomery, T., 2011. The ugly side of amphetamines:  
695 short- and long-term toxicity of 3,4-methylenedioxymethamphetamine (MDMA, 'Ecstasy'),  
696 methamphetamine and D-amphetamine. *Biol Chem* 392, 103–115.  
697 <https://doi.org/10.1515/BC.2011.016>
- 698 Steinman, M.Q., Kirson, D., Wolfe, S.A., Khom, S., D'Ambrosio, S.R., Spierling Bagic, S.R., Bajo,  
699 M., Vlkolinský, R., Hoang, N.K., Singhal, A., Sureshchandra, S., Oleata, C.S., Messaoudi, I.,  
700 Zorrilla, E.P., Roberto, M., 2020. Importance of sex and trauma context on circulating cytokines  
701 and amygdalar GABAergic signaling in a comorbid model of posttraumatic stress and alcohol  
702 use disorders. *Mol Psychiatry*. <https://doi.org/10.1038/s41380-020-00920-2>
- 703 Suárez, J., Khom, S., Alén, F., Natividad, L.A., Varodayan, F.P., Patel, R.R., Kirson, D., Arco, R.,  
704 Ballesta, A., Bajo, M., Rubio, L., Martin-Fardon, R., Rodríguez de Fonseca, F., Roberto, M.,  
705 2019. Cessation of fluoxetine treatment increases alcohol seeking during relapse and  
706 dysregulates endocannabinoid and glutamatergic signaling in the central amygdala. *Addict*  
707 *Biol* e12813. <https://doi.org/10.1111/adb.12813>
- 708 Sun, W., Yuill, M.B., 2020. Role of the GABA<sub>A</sub> and GABA<sub>B</sub> receptors of the central nucleus of the  
709 amygdala in compulsive cocaine-seeking behavior in male rats. *Psychopharmacology (Berl)*  
710 237, 3759–3771. <https://doi.org/10.1007/s00213-020-05653-2>
- 711 Uprety, R., Che, T., Zaidi, S.A., Grinnell, S.G., Varga, B.R., Faouzi, A., Slocum, S.T., Allaoa, A.,  
712 Varadi, A., Nelson, M., Bernhard, S.M., Kulko, E., Le Rouzic, V., Eans, S.O., Simons, C.A.,  
713 Hunkele, A., Subrath, J., Pan, Y.X., Javitch, J.A., McLaughlin, J.P., Roth, B.L., Pasternak,  
714 G.W., Katritch, V., Majumdar, S., 2021. Controlling opioid receptor functional selectivity by  
715 targeting distinct subpockets of the orthosteric site. *Elife* 10, e56519.  
716 <https://doi.org/10.7554/eLife.56519>
- 717 Vandewater, S.A., Creehan, K.M., Taffe, M.A., 2015. Intravenous self-administration of entactogen-  
718 class stimulants in male rats. *Neuropharmacology* 99, 538–545.  
719 <https://doi.org/10.1016/j.neuropharm.2015.08.030>
- 720 Varodayan, F.P., Khom, S., Patel, R.R., Steinman, M.Q., Hedges, D.M., Oleata, C.S., Homanics, G.E.,  
721 Roberto, M., Bajo, M., 2018. Role of TLR4 in the Modulation of Central Amygdala GABA  
722 Transmission by CRF Following Restraint Stress. *Alcohol Alcohol.*  
723 <https://doi.org/10.1093/alcalc/agx114>
- 724 Wright, M.J., Angrish, D., Aarde, S.M., Barlow, D.J., Buczynski, M.W., Creehan, K.M., Vandewater,  
725 S.A., Parsons, L.H., Houseknecht, K.L., Dickerson, T.J., Taffe, M.A., 2012. Effect of ambient  
726 temperature on the thermoregulatory and locomotor stimulant effects of 4-  
727 methylmethcathinone in Wistar and Sprague-Dawley rats. *PLoS One* 7, e44652.  
728 <https://doi.org/10.1371/journal.pone.0044652>

729

730

731 **Conflict of Interest**

732 The authors declare that the research was conducted in the absence of any commercial or financial  
733 relationships that could be construed as a potential conflict of interest.

734

735 **Author Contributions**

736 This is manuscript number 30134 from the Scripps Research Institute. SK, JDN, MR and MAT  
737 designed the studies. SK, JDN, YG, and SAV performed the research and conducted initial data  
738 analysis. SK, JDN, MR and MAT conducted statistical analysis of data, created figures, and wrote the  
739 paper. All authors approved of the submitted version of the manuscript.

740

741 **Funding**

742 This research was financially supported by NIH/NIDA grants DA024105, DA024704, DA042211 (all  
743 to M.A.T), DA047413 (to J.D.N) and NIH/NIAAA grants AA013498, AA021491, AA006420,  
744 AA017447, AA007456 (to M.R), the Austrian Science Fund (FWF) J-3942 (to S.K) and the Pearson  
745 Center for Alcoholism and Addiction Research. The National Institutes of Health / NIDA / NIAA or the  
746 Austrian Science Fund had no direct influence on the design, conduct, analysis, or decision to  
747 publication of the findings.

748

749 **Data Availability Statement**

750 All data needed to evaluate the conclusions in this paper are present in the paper. Additional data  
751 related to this paper may be requested from the corresponding authors.

752

753 **Declaration of Transparency and Scientific Rigor:**

754 This paper adheres to the principles for transparent reporting and scientific rigor of preclinical research  
755 recommended by funding agencies, publishers and other organizations engaged with supporting  
756 research.

757

758

759

760
